# Supplementary material for: Polyvalent Immunoglobulin Preparations Inhibit Pneumolysin-Induced Platelet Destruction
Source: PubMed Central journal article supplement — Thromb Haemost. 2022 Feb 8;122(7):1147–58. doi: 10.1055/a-1723-1880 (PMC9385248; doi:10.1055/a-1723-1880), 2022-02-08
Supplement: 10-1055-a-1723-1880-s210504.pdf [file 10-1055-a-1723-1880-s210504.pdf]

# Supplement

Figure S1

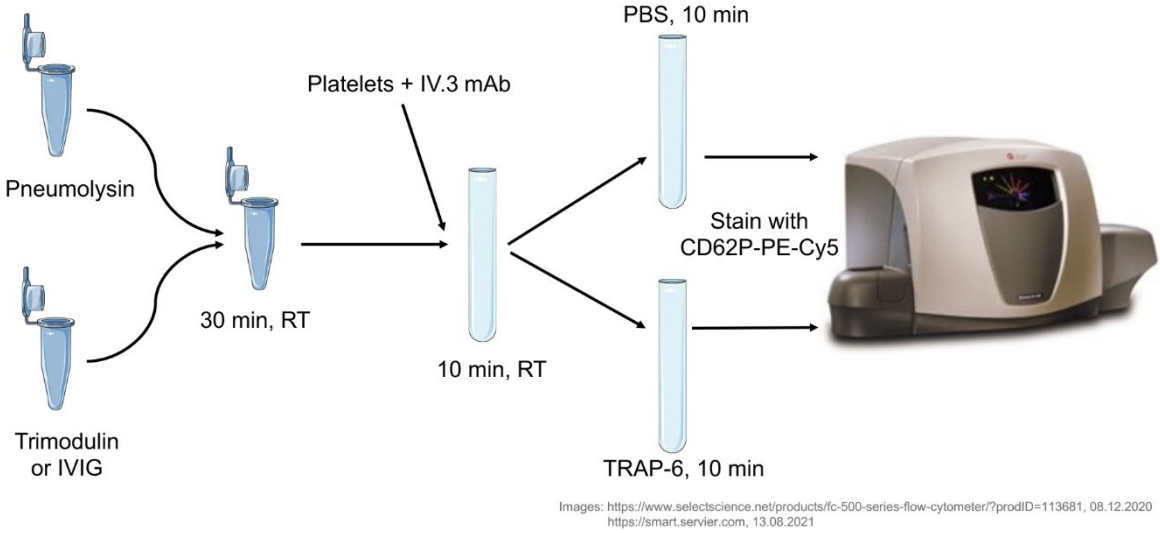

Figure S1: Experimental setup of CD62P assay.

Figure S2

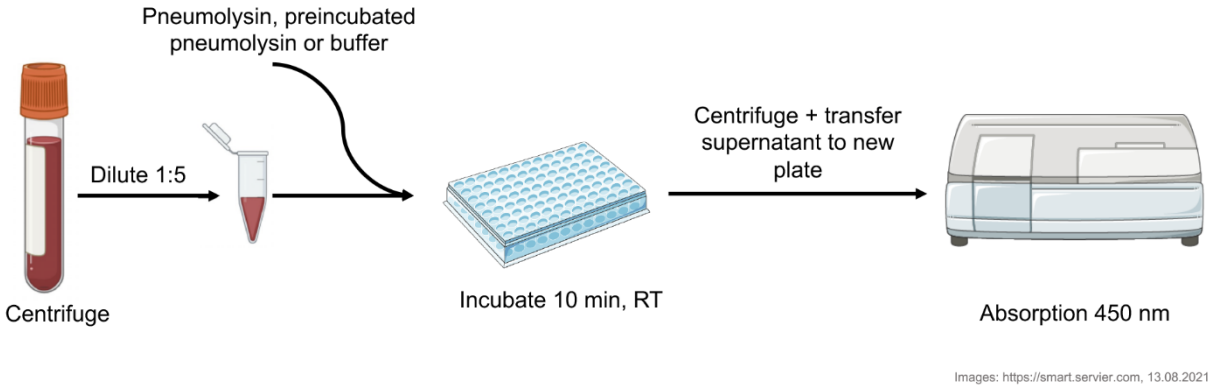

Figure S2: Experimental setup of the hemolysis assay.

**Figure S3**

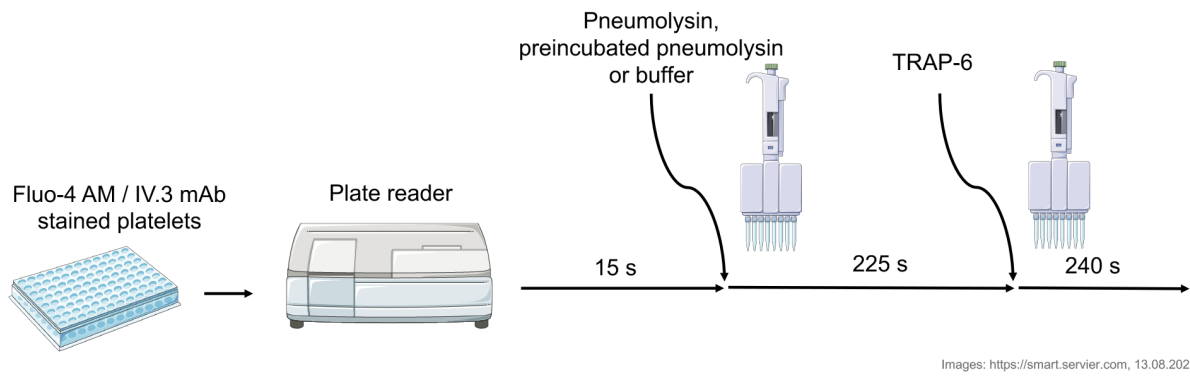

**Figure S3:** Experimental setup of the calcium release assay.

**Figure S4**

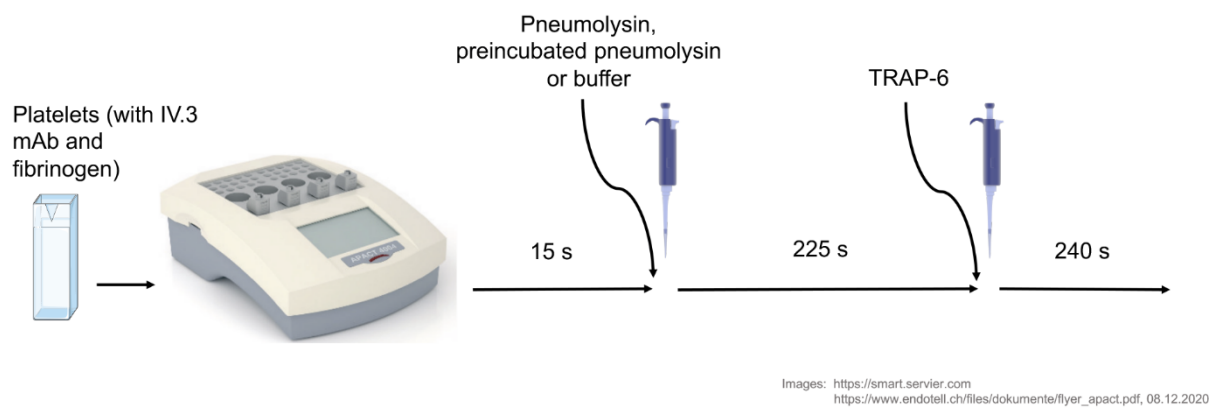

**Figure S4:** Experimental setup of aggregometry.

**Figure S5**

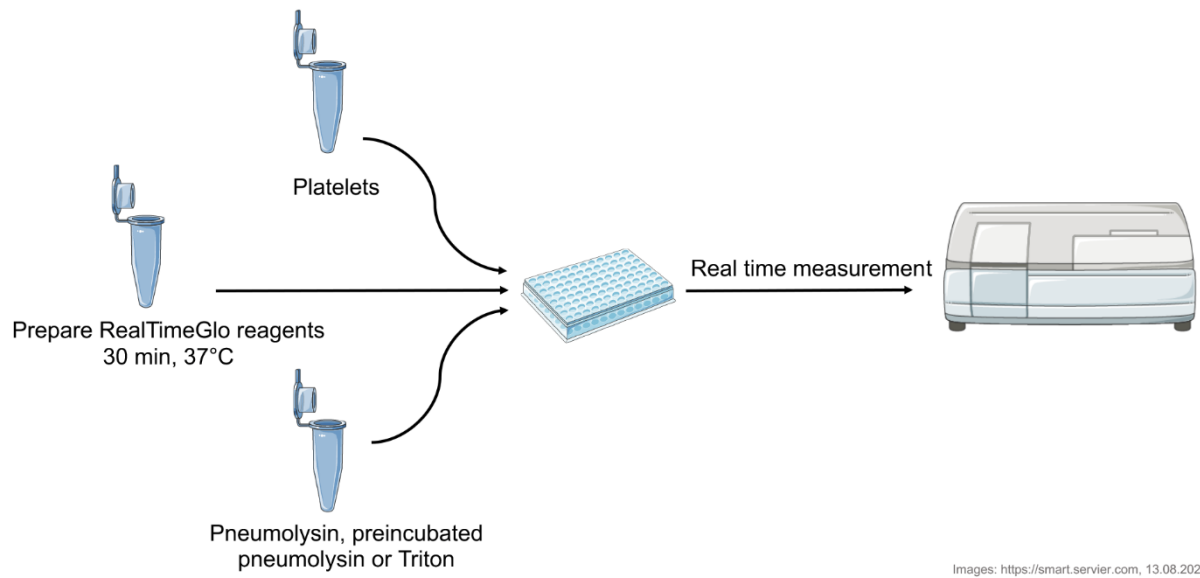

**Figure S5:** Experimental setup of the platelet viability assay.

**Figure S6**

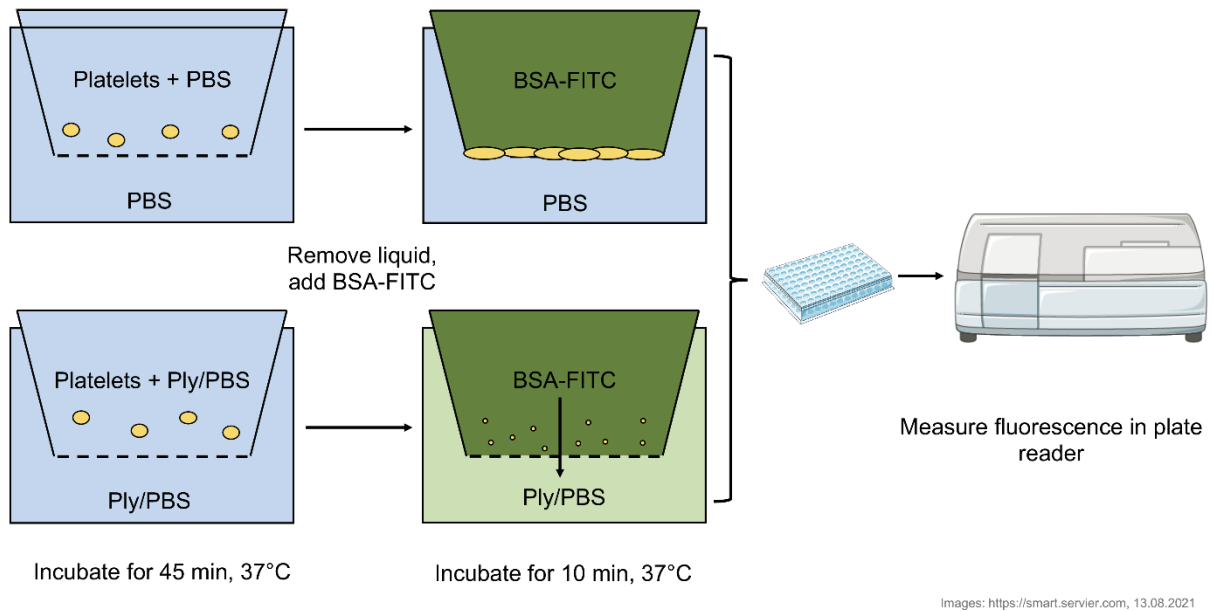

**Figure S6:** Experimental setup of the transwell assay.

**Figure S7**

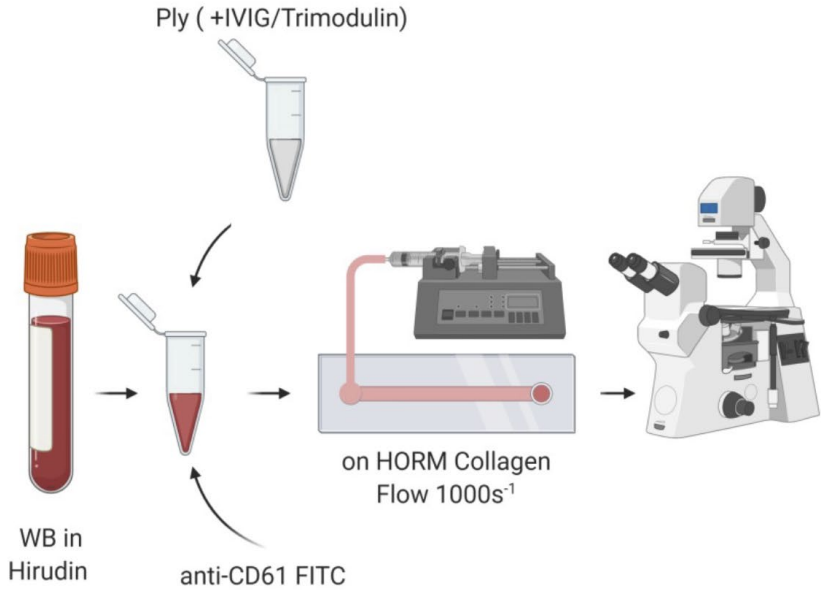

**Figure S7:** Experimental setup of the flow chamber assay.

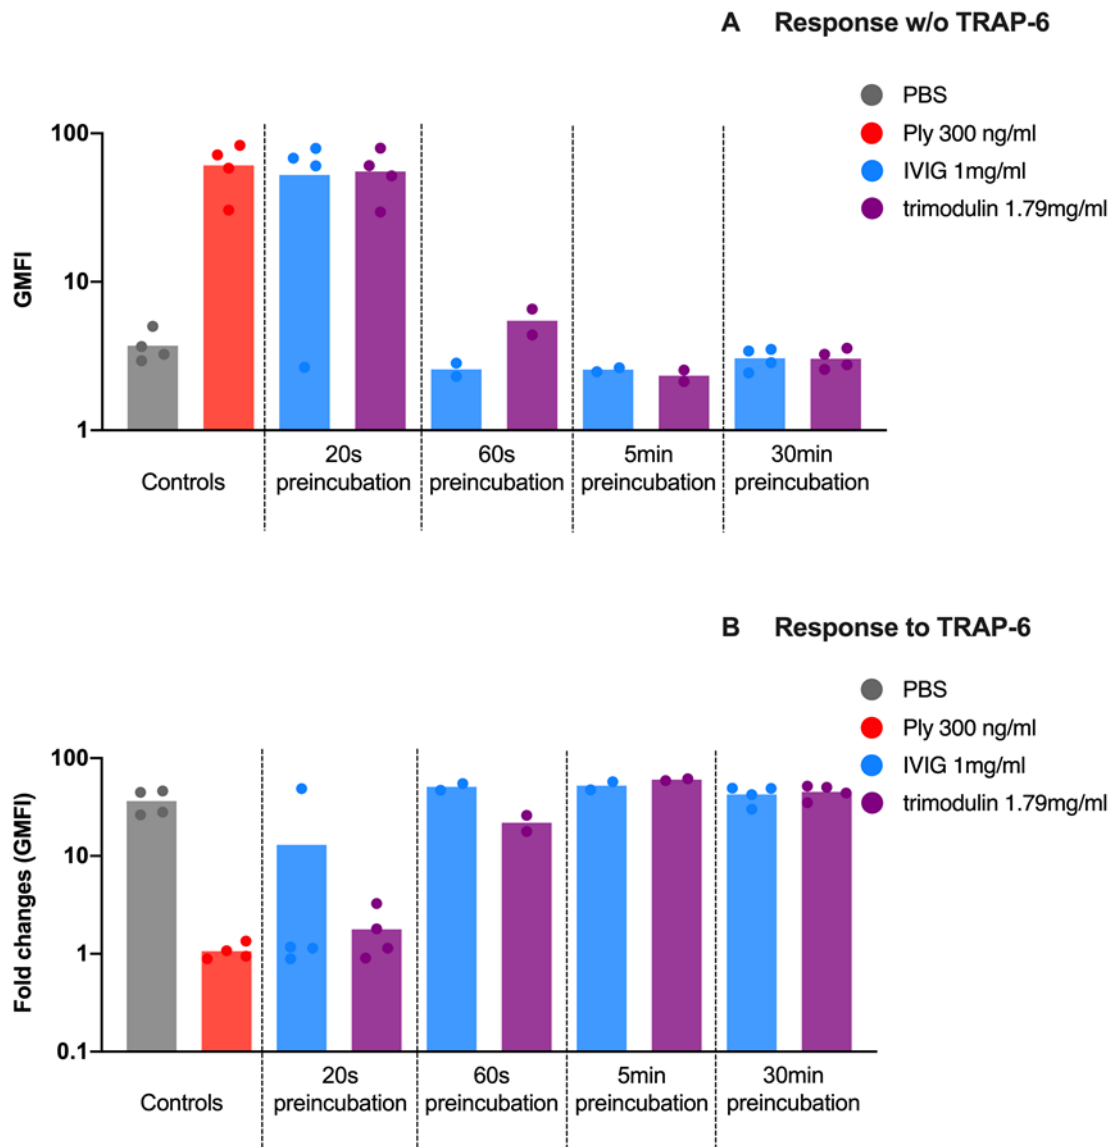

**Figure S8: CD62P staining in platelets upon pneumolysin treatment.**

(A) CD62P staining upon treatment with pneumolysin or pneumolysin preincubated with IVIG or trimodulin. CD62P staining is presented as geometric mean fluorescence intensity (GMFI) of CD62P-positive gated events. As a control, samples were incubated only with PBS.

(B) CD62P staining upon TRAP-6 (20  $\mu$ M) addition after preincubation of platelets with pneumolysin or pneumolysin preincubated with IVIG or trimodulin. Response to TRAP-6 is presented as a fold change of the GMFI of CD62P-positive gated events. As a control, samples were incubated with PBS only.

**Figure S9**

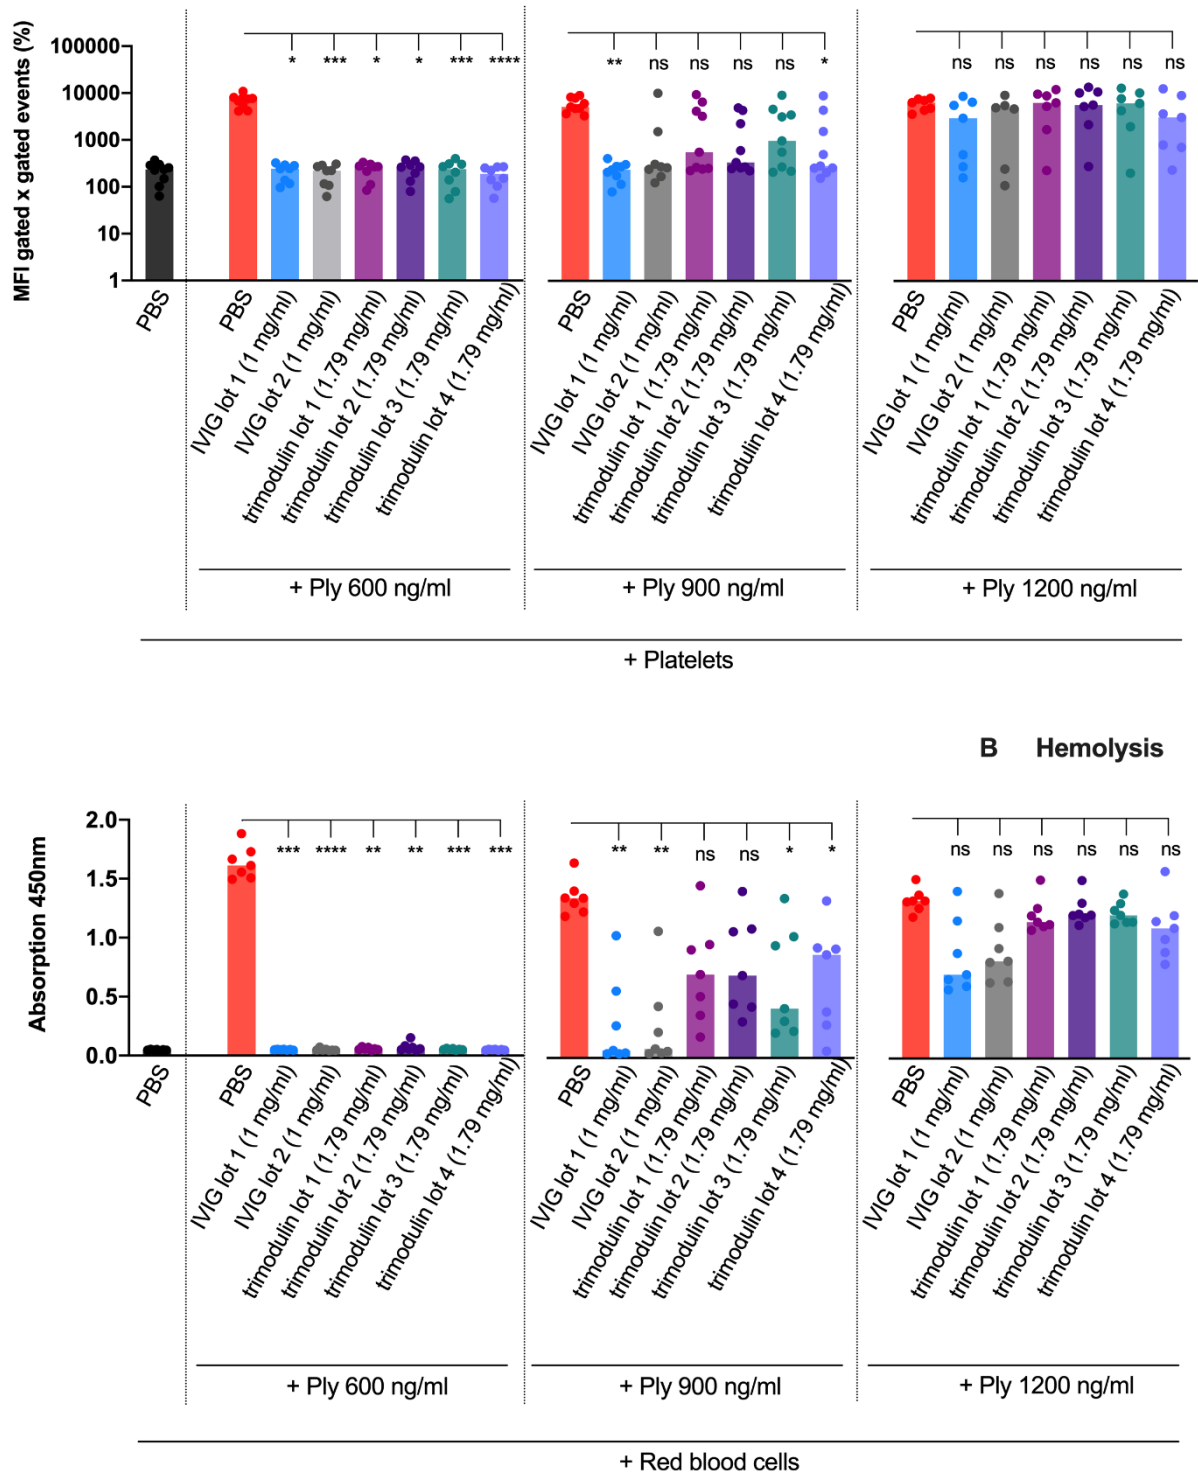

**Figure S9: Batch-to-batch variability of immunoglobulin preparations used for neutralization of pneumolysin**

**(A)** CD62P staining in platelets upon pneumolysin (Ply) treatment. CD62P staining is presented as the mean fluorescence intensity of CD62P-positive events multiplied with the percentage of positive gated events. As control, platelets were incubated only with PBS. Bars represent the median.

**(B)** Hemolysis upon pneumolysin treatment. Hemolysis was quantified by absorption measurement at 450 nm as a measure for hemoglobin content in the supernatant (B). As control, erythrocytes were incubated only with PBS. Bars represent the median.

Statistical analysis was performed using Friedman test followed by uncorrected Dunn's test for multiple comparisons. A p-value < 0.05 was considered to be significant (\* > 0.033, \*\* > 0.002, \*\*\* > 0.001).

Figure S10

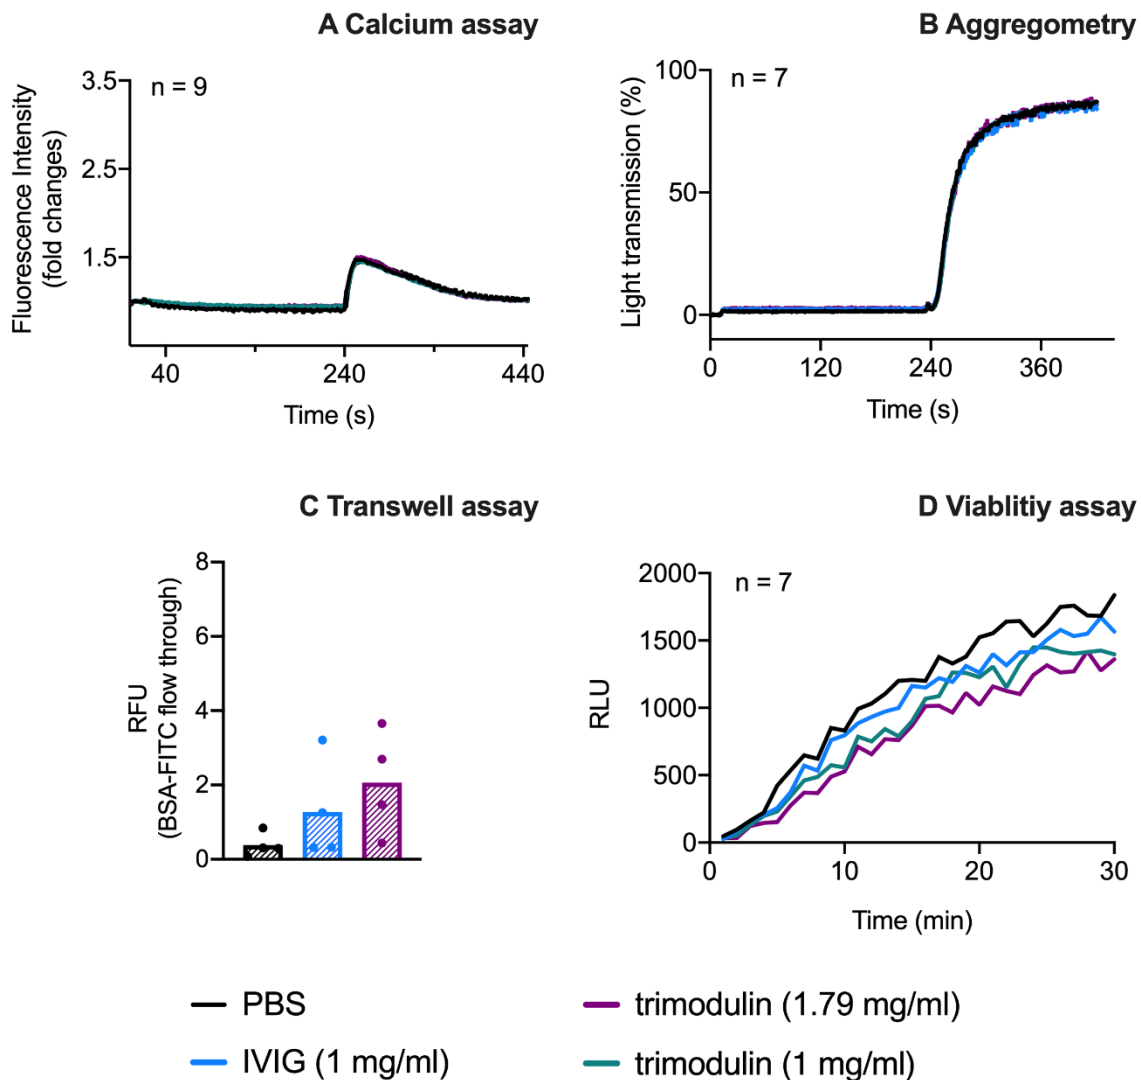

**Figure S10: Controls of IVIG and trimodulin in the aggregometry, calcium -, transwell - and viability - assays.**

**(A)** Incubation of the IVIG or trimodulin with platelets in the calcium assay. Curves represent the median of platelets of 9 donors.

**(B)** Incubation of the IVIG or trimodulin with platelets in aggregometry. Curves represent the median of platelets of 7 donors.

**(C)** Incubation of the IVIG or trimodulin with platelets in the transwell assay. Bars represent the mean of platelets of 4 donors.

**(D)** Incubation of the IVIG or trimodulin with platelets in the viability assay.

Controls of the immunoglobulin preparations in the CD62P assay, thrombus formation assay and hemolysis assay are presented in Figure 1, 5 and S1.
